# Supplementary material for: C∙∙∙O and Si∙∙∙O Tetrel Bonds: Substituent Effects and Transfer of the SiF3 Group
Source: MDPI journal article supplement (doi:10.3390/ijms241511884), 2023-07-25
Supplement: s1 [file s1]

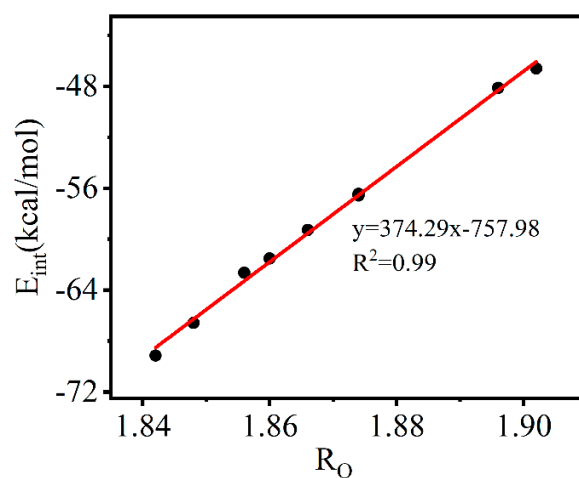

**Figure S1.** Linear correlation of the interaction energy ( $E_{int}$ ) with the Si $\cdots$ O distance ( $R_O$ ) in the S-SiF<sub>3</sub> systems

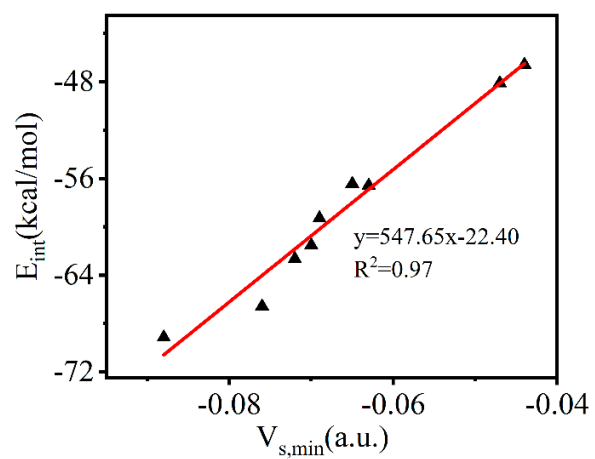

**Figure S2.** Linear relationship between the interaction energy ( $E_{int}$ ) and the minimum MEP ( $V_{s,min}$ ) on the O atom of POX.

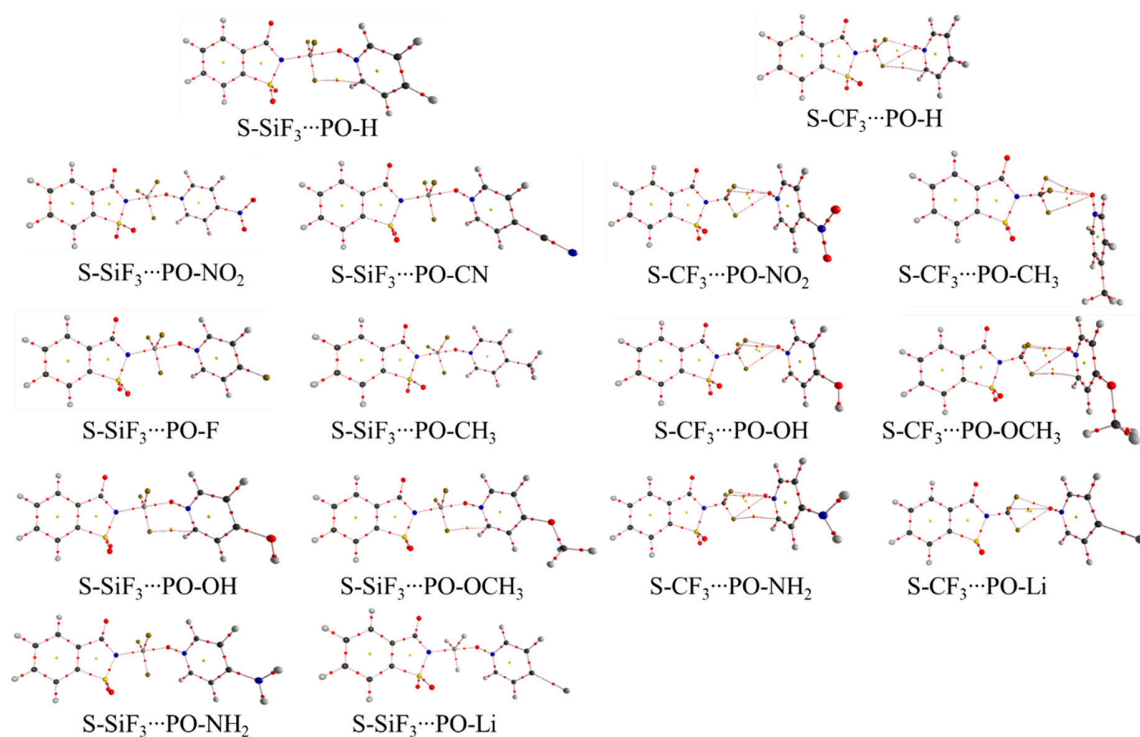

**Figure S3.** AIM diagrams of all complexes. Bond paths indicated by broken lines with bond critical point represented by small sphere.

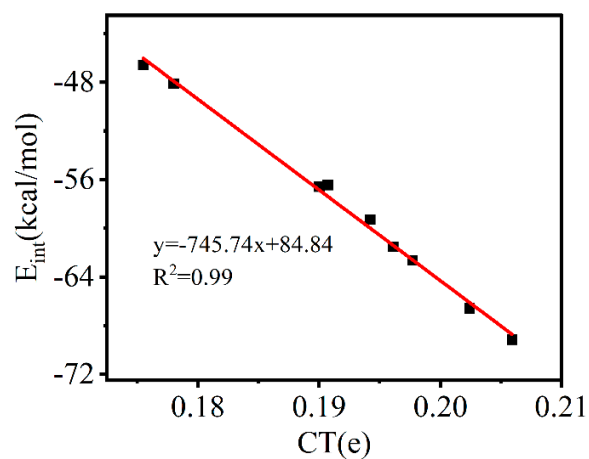

**Figure S4.** Linear diagram of the interaction energy ( $E_{\text{int}}$ ) in relation to the charge transfer (CT) in the S-SiF<sub>3</sub>...POX complexes

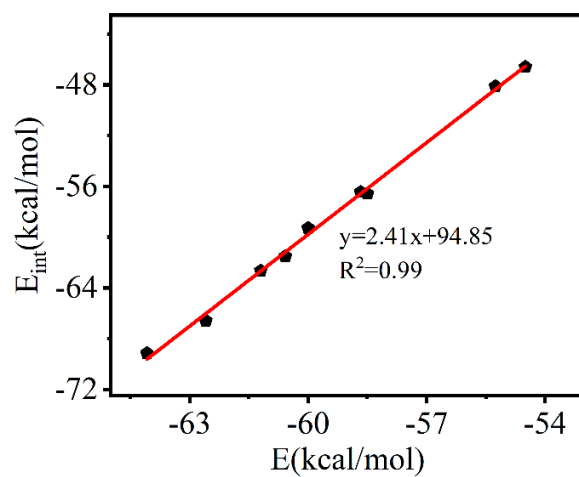

**Figure S5.** Linear diagram of the interaction energy ( $E_{\text{int}}$ ) with the NOCV orbital energy ( $E$ ) in the S-SiF<sub>3</sub> system

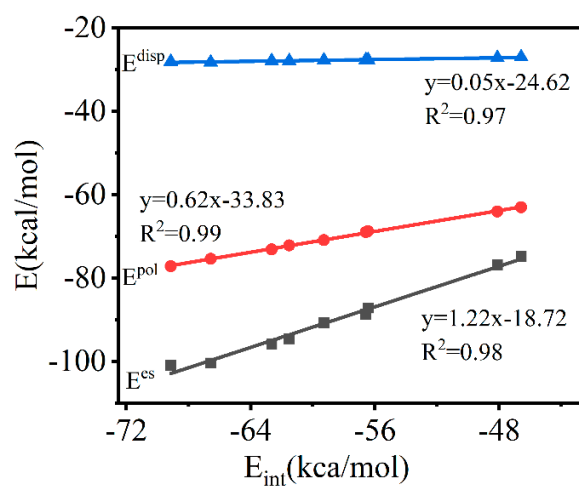

**Figure S6.** Linear correlation between the interaction energy ( $E_{\text{int}}$ ) with three attractive terms ( $E^{\text{es}}$ ,  $E^{\text{pol}}$ , and  $E^{\text{disp}}$ ) from the energy decomposition of the S-SiF<sub>3</sub> complexes

# COORDINATES OF MONOMERS AND COMPLEXES

## S-CF<sub>3</sub>

|   |             |             |             |
|---|-------------|-------------|-------------|
| C | 1.47295500  | -0.50873600 | -0.00539700 |
| C | 1.34053000  | 0.87027000  | -0.02294600 |
| C | 2.47063000  | 1.68045200  | -0.01147000 |
| C | 3.71966900  | 1.06117300  | 0.01475100  |
| C | 3.83306900  | -0.33406100 | 0.02832100  |
| C | 2.70044100  | -1.15106600 | 0.01762200  |
| C | -0.07035500 | 1.34800000  | -0.05187800 |
| H | 2.35950800  | 2.76318800  | -0.02400800 |
| H | 4.62202600  | 1.66971600  | 0.02375800  |
| H | 4.82054800  | -0.79233900 | 0.04857600  |
| H | 2.77699800  | -2.23651500 | 0.02767800  |
| N | -0.91724200 | 0.22997200  | -0.13383800 |
| S | -0.11498000 | -1.31843300 | -0.01062400 |
| O | -0.44886100 | 2.48759600  | -0.01659200 |
| O | -0.32722500 | -2.07406100 | -1.24401900 |
| O | -0.42177400 | -1.91537800 | 1.28980000  |
| C | -2.33254400 | 0.34953800  | -0.00319800 |
| F | -2.84081800 | 1.10176500  | -0.97644000 |
| F | -2.87350200 | -0.86827500 | -0.07354200 |
| F | -2.67925800 | 0.90011100  | 1.16137300  |

## S-SiF<sub>3</sub>

|    |             |             |             |
|----|-------------|-------------|-------------|
| C  | 1.75817200  | -0.47728500 | 0.00004400  |
| C  | 1.55713800  | 0.89384700  | -0.00023800 |
| C  | 2.64510600  | 1.76035500  | -0.00027100 |
| C  | 3.92318600  | 1.20287400  | -0.00001200 |
| C  | 4.10568500  | -0.18550200 | 0.00038600  |
| C  | 3.01561800  | -1.05826900 | 0.00042500  |
| C  | 0.12112300  | 1.28453200  | -0.00013300 |
| H  | 2.48160900  | 2.83647500  | -0.00052500 |
| H  | 4.79506400  | 1.85435500  | -0.00006800 |
| H  | 5.11520000  | -0.59330100 | 0.00075600  |
| H  | 3.14619300  | -2.13853300 | 0.00077200  |
| N  | -0.68741300 | 0.13674900  | 0.00036200  |
| S  | 0.20352000  | -1.35370500 | -0.00018300 |
| O  | -0.33041200 | 2.40195300  | -0.00026700 |
| O  | -0.02158700 | -2.04616000 | -1.27086100 |
| O  | -0.02121300 | -2.04743700 | 1.26987400  |
| F  | -2.94723000 | 1.04725200  | -1.29558900 |
| F  | -2.97932300 | -1.22039000 | 0.00017500  |
| F  | -2.94667000 | 1.04768100  | 1.29629700  |
| Si | -2.42099800 | 0.27728500  | 0.00002400  |

## PO

|   |             |             |             |
|---|-------------|-------------|-------------|
| C | -1.09629400 | -1.19240200 | 0.00000300  |
| C | 0.28722500  | -1.17443800 | -0.00002200 |
| C | 0.28721200  | 1.17444700  | -0.00001400 |
| C | -1.09627000 | 1.19242100  | -0.00000200 |
| C | -1.81659100 | -0.00000600 | 0.00001100  |
| H | -1.60041600 | -2.15664600 | 0.00000400  |
| H | 0.92158700  | -2.05491800 | -0.00000100 |
| H | 0.92164800  | 2.05487400  | -0.00000200 |
| H | -1.60043000 | 2.15664300  | -0.00000600 |
| H | -2.90363800 | 0.00002400  | 0.00003800  |
| N | 0.98006000  | -0.00002300 | -0.00000700 |
| O | 2.25114200  | 0.00000700  | 0.00001900  |

#### PO-NO<sub>2</sub>

|   |             |             |             |
|---|-------------|-------------|-------------|
| C | -0.02757200 | 1.20648800  | -0.00007100 |
| C | -1.40586200 | 1.18298900  | -0.00004900 |
| C | -1.40578700 | -1.18298500 | 0.00005300  |
| C | -0.02752300 | -1.20640800 | 0.00005700  |
| C | 0.66165500  | 0.00006000  | -0.00002300 |
| H | 0.50930700  | 2.15121300  | -0.00012000 |
| H | -2.04217000 | 2.06165500  | -0.00008500 |
| H | -2.04210700 | -2.06164200 | 0.00009300  |
| H | 0.50944500  | -2.15108000 | 0.00010600  |
| N | -2.09706300 | 0.00000900  | -0.00000300 |
| O | -3.35606900 | -0.00005100 | 0.00001100  |
| N | 2.12482900  | -0.00000600 | 0.00000000  |
| O | 2.68429900  | -1.07949700 | -0.00013600 |
| O | 2.68448300  | 1.07942000  | 0.00015400  |

#### PO-CN

|   |             |             |             |
|---|-------------|-------------|-------------|
| C | 0.32719300  | -1.20016800 | 0.00002600  |
| C | -1.05139900 | -1.17918600 | -0.00001900 |
| C | -1.05152000 | 1.17916900  | -0.00001900 |
| C | 0.32713100  | 1.20024900  | 0.00002500  |
| C | 1.04582700  | 0.00010000  | -0.00001000 |
| H | 0.84234500  | -2.15788600 | 0.00006600  |
| H | -1.68480000 | -2.06020400 | -0.00000100 |
| H | -1.68489700 | 2.06020400  | 0.00000100  |
| H | 0.84211300  | 2.15806000  | 0.00006700  |
| N | -1.74489400 | 0.00000500  | -0.00006200 |
| O | -3.00627100 | -0.00008600 | 0.00003900  |
| C | 2.48185800  | -0.00011100 | 0.00001400  |
| N | 3.63930400  | 0.00002300  | -0.00001600 |

#### PO-F

|   |             |            |             |
|---|-------------|------------|-------------|
| C | -0.66357000 | 1.20238500 | -0.00000400 |
|---|-------------|------------|-------------|

|   |             |             |             |
|---|-------------|-------------|-------------|
| C | 0.71984100  | 1.17378700  | 0.00000100  |
| C | 0.71983900  | -1.17378900 | 0.00000400  |
| C | -0.66356800 | -1.20238400 | -0.00000200 |
| C | -1.35223900 | 0.00000200  | -0.00000700 |
| H | -1.19382900 | 2.15145200  | -0.00000600 |
| H | 1.35194100  | 2.05587500  | 0.00000500  |
| H | 1.35194400  | -2.05587200 | 0.00000900  |
| H | -1.19383400 | -2.15144800 | -0.00000200 |
| N | 1.41202300  | 0.00000200  | 0.00000200  |
| O | 2.68679500  | -0.00000200 | 0.00001600  |
| F | -2.69517300 | -0.00000200 | -0.00001100 |

#### PO-CH<sub>3</sub>

|   |             |             |             |
|---|-------------|-------------|-------------|
| C | -0.60526300 | 1.18869600  | -0.00253500 |
| C | 0.77973200  | 1.17044400  | -0.00042000 |
| C | 0.77222800  | -1.17035300 | -0.00059400 |
| C | -0.60913800 | -1.18242500 | -0.00231700 |
| C | -1.34573500 | 0.00671700  | -0.00255600 |
| H | -1.10453400 | 2.15667400  | -0.00453200 |
| H | 1.41087100  | 2.05348200  | -0.00052600 |
| H | 1.40124200  | -2.05495300 | -0.00110200 |
| H | -1.11401900 | -2.14800400 | -0.00403800 |
| N | 1.47222200  | -0.00001500 | 0.00089700  |
| O | 2.74672600  | -0.00613000 | 0.00235600  |
| C | -2.85002500 | -0.00204100 | 0.00304300  |
| H | -3.24062400 | -0.59880100 | -0.83077900 |
| H | -3.23445800 | -0.43944300 | 0.93356000  |
| H | -3.24863500 | 1.01396500  | -0.08543300 |

#### PO-OH

|   |             |             |             |
|---|-------------|-------------|-------------|
| C | 0.65954100  | -1.18507000 | -0.00000900 |
| C | -0.72527600 | -1.17011300 | -0.00002200 |
| C | -0.74145700 | 1.16750600  | -0.00002500 |
| C | 0.63879400  | 1.20636600  | 0.00004800  |
| C | 1.36576500  | 0.01609800  | -0.00002300 |
| H | 1.17336500  | -2.14575800 | -0.00007600 |
| H | -1.34608900 | -2.06036000 | -0.00000700 |
| H | -1.37857400 | 2.04621700  | 0.00007500  |
| H | 1.15577600  | 2.16296400  | 0.00028900  |
| N | -1.42861700 | -0.00846000 | -0.00008200 |
| O | -2.70944900 | -0.01687700 | 0.00007000  |
| O | 2.72273500  | 0.09625400  | -0.00019800 |
| H | 3.10535100  | -0.78758600 | 0.00150900  |

#### PO-OCH<sub>3</sub>

|   |             |            |             |
|---|-------------|------------|-------------|
| C | -0.00516100 | 1.36377400 | -0.00010400 |
|---|-------------|------------|-------------|

|   |             |             |             |
|---|-------------|-------------|-------------|
| C | 1.35213200  | 1.13080700  | -0.00001600 |
| C | 1.00151300  | -1.17865300 | -0.00012300 |
| C | -0.37557100 | -1.00103900 | -0.00022000 |
| C | -0.90301200 | 0.29018600  | -0.00010500 |
| H | -0.38063400 | 2.38424700  | -0.00013900 |
| H | 2.10970300  | 1.90861900  | -0.00000600 |
| H | 1.48772200  | -2.14933200 | -0.00007400 |
| H | -1.00360800 | -1.88668000 | -0.00042000 |
| N | 1.86389200  | -0.13420000 | 0.00004700  |
| O | 3.13101900  | -0.32252000 | 0.00021200  |
| O | -2.22133500 | 0.59814800  | -0.00000200 |
| C | -3.13500600 | -0.48456200 | 0.00020100  |
| H | -3.00812800 | -1.10380600 | -0.89942400 |
| H | -3.00762500 | -1.10406000 | 0.89962700  |
| H | -4.13151900 | -0.03768300 | 0.00061800  |

PO-NH<sub>2</sub>

|   |             |             |             |
|---|-------------|-------------|-------------|
| C | -0.63157300 | -1.19178300 | -0.00456500 |
| C | 0.75021700  | -1.16584600 | -0.00084200 |
| C | 0.74988000  | 1.16587100  | -0.00085400 |
| C | -0.63154300 | 1.19164400  | -0.00462400 |
| C | -1.36649100 | -0.00023800 | -0.00449300 |
| H | -1.13405200 | -2.15776400 | -0.01328300 |
| H | 1.37688100  | -2.05220400 | 0.00108400  |
| H | 1.37709900  | 2.05183600  | 0.00077500  |
| H | -1.13446200 | 2.15741200  | -0.01294300 |
| N | 1.44781200  | -0.00018900 | 0.00214300  |
| O | 2.73222100  | 0.00029600  | 0.00912900  |
| N | -2.75548700 | 0.00014900  | -0.07159600 |
| H | -3.20669200 | -0.83929500 | 0.26473200  |
| H | -3.20575400 | 0.84003500  | 0.26503600  |

PO-Li

|    |             |             |             |
|----|-------------|-------------|-------------|
| C  | 0.92861400  | -1.17003000 | 0.00001200  |
| C  | -0.45897300 | -1.16520100 | 0.00001100  |
| C  | -0.45892000 | 1.16520800  | 0.00000400  |
| C  | 0.92863000  | 1.17000400  | 0.00001700  |
| C  | 1.71995800  | -0.00004700 | 0.00000400  |
| H  | 1.38922600  | -2.16153300 | 0.00001900  |
| H  | -1.09016400 | -2.04939700 | 0.00000600  |
| H  | -1.09014800 | 2.04937800  | 0.00000300  |
| H  | 1.38930600  | 2.16147400  | 0.00002900  |
| N  | -1.15778800 | -0.00000900 | -0.00003200 |
| O  | -2.43942200 | 0.00004200  | 0.00000000  |
| Li | 3.68860300  | 0.00006800  | -0.00004100 |

S-CF<sub>3</sub>...PO

|   |             |             |             |
|---|-------------|-------------|-------------|
| C | -2.93706400 | -0.63845500 | 0.04845700  |
| C | -2.92936900 | 0.67106800  | 0.49994700  |
| C | -4.03948400 | 1.18917900  | 1.15778700  |
| C | -5.14233700 | 0.35472300  | 1.33675300  |
| C | -5.13305500 | -0.96476000 | 0.86780800  |
| C | -4.01949300 | -1.48857200 | 0.20812400  |
| C | -1.66296200 | 1.40440400  | 0.21572100  |
| H | -4.02703100 | 2.21838800  | 1.51156100  |
| H | -6.02646300 | 0.73272600  | 1.84673200  |
| H | -6.00808800 | -1.59437600 | 1.01911200  |
| H | -4.00108700 | -2.51164700 | -0.16188600 |
| N | -0.83997000 | 0.58673300  | -0.57935800 |
| S | -1.39647600 | -1.06037400 | -0.73944300 |
| O | -1.37296300 | 2.50911500  | 0.58787500  |
| O | -0.57533800 | -1.92786800 | 0.10946400  |
| O | -1.59247100 | -1.37963200 | -2.15253100 |
| C | 0.54859100  | 0.89393700  | -0.77533000 |
| F | 1.20415800  | 0.93136300  | 0.38810400  |
| F | 1.07778800  | -0.06660500 | -1.53371300 |
| F | 0.68623900  | 2.06380300  | -1.37538900 |
| C | 4.00049400  | -1.90803200 | 0.55759300  |
| C | 3.78979500  | -0.99366800 | -0.45939800 |
| C | 4.20363000  | 0.78753200  | 1.01504300  |
| C | 4.42508400  | -0.09887800 | 2.05352300  |
| C | 4.32399100  | -1.47206600 | 1.84013700  |
| H | 3.90212100  | -2.96671500 | 0.32812700  |
| H | 3.52948000  | -1.24862600 | -1.48123600 |
| H | 4.24835500  | 1.86867700  | 1.09718000  |
| H | 4.67316700  | 0.30436000  | 3.03303300  |
| H | 4.49013100  | -2.17971400 | 2.64843600  |
| N | 3.88574900  | 0.34642800  | -0.23426300 |
| O | 3.66102100  | 1.17779100  | -1.17263700 |

S-CF<sub>3</sub>...PO-NO<sub>2</sub>

|   |            |             |             |
|---|------------|-------------|-------------|
| C | 3.40202000 | -0.95190700 | 0.22620600  |
| C | 3.61823600 | 0.02697500  | -0.73045700 |
| C | 4.75276000 | -0.01741100 | -1.53263500 |
| C | 5.65265200 | -1.06397500 | -1.33607500 |
| C | 5.42108500 | -2.04015000 | -0.35921600 |
| C | 4.28106400 | -2.00046500 | 0.44666200  |
| C | 2.55120300 | 1.06419300  | -0.79529700 |
| H | 4.91345400 | 0.75333200  | -2.28407200 |
| H | 6.55088200 | -1.12375100 | -1.94801600 |
| H | 6.14157400 | -2.84482500 | -0.22353700 |
| H | 4.09282700 | -2.75424600 | 1.20857500  |



|   |             |             |             |
|---|-------------|-------------|-------------|
| N | 1.64169200  | 0.83659200  | 0.25370000  |
| S | 1.86969300  | -0.68012600 | 1.09434500  |
| O | 2.45975700  | 1.95623200  | -1.59429900 |
| O | 0.83127100  | -1.62107000 | 0.66764700  |
| O | 2.09529600  | -0.42139900 | 2.51506000  |
| C | 0.37172500  | 1.49577800  | 0.28248000  |
| F | -0.34116400 | 1.22872300  | -0.81823000 |
| F | -0.30806100 | 1.04636500  | 1.34175300  |
| F | 0.52219800  | 2.80562100  | 0.37743400  |
| C | -3.94214900 | -0.41483700 | 0.98921100  |
| C | -3.33370800 | 0.79972200  | 1.22435800  |
| C | -3.34695500 | 1.30034100  | -1.08742400 |
| C | -3.95445600 | 0.09606800  | -1.36992500 |
| C | -4.25426800 | -0.76241300 | -0.31908800 |
| H | -4.16985600 | -1.08755400 | 1.81127100  |
| H | -3.03774500 | 1.16904600  | 2.20047100  |
| H | -3.06150800 | 2.04196600  | -1.82631000 |
| H | -4.19315400 | -0.17644000 | -2.39418400 |
| N | -3.04105200 | 1.65661600  | 0.19834100  |
| O | -2.47989600 | 2.76135900  | 0.43310000  |
| N | -4.90375100 | -2.04457700 | -0.59329300 |
| O | -5.14335600 | -2.31330300 | -1.75504700 |
| O | -5.16329600 | -2.75604800 | 0.35774300  |

S-CF<sub>3</sub>...PO-CH<sub>3</sub>

|   |             |             |             |
|---|-------------|-------------|-------------|
| C | -3.03211800 | 0.87088800  | 0.12756500  |
| C | -3.31521300 | -0.35585900 | -0.44983700 |
| C | -4.56547300 | -0.59137400 | -1.01112400 |
| C | -5.50711400 | 0.43618600  | -0.96554900 |
| C | -5.20368900 | 1.66784400  | -0.37228000 |
| C | -3.94878200 | 1.90804300  | 0.19090700  |
| C | -2.18406400 | -1.32592300 | -0.40094200 |
| H | -4.78147300 | -1.55696500 | -1.46456100 |
| H | -6.49494200 | 0.28069400  | -1.39532900 |
| H | -5.95778200 | 2.45255200  | -0.34864100 |
| H | -3.70184000 | 2.86044300  | 0.65552500  |
| N | -1.14335200 | -0.76304400 | 0.35908200  |
| S | -1.36510100 | 0.92238700  | 0.75264600  |
| O | -2.14674500 | -2.41233200 | -0.91185200 |
| O | -0.49443600 | 1.73508500  | -0.10111900 |
| O | -1.34738000 | 1.09667400  | 2.20438500  |
| C | 0.17537300  | -1.33303700 | 0.35714700  |
| F | 0.69484900  | -1.34566000 | -0.87127800 |
| F | 0.94650800  | -0.57521300 | 1.14054300  |
| F | 0.14561400  | -2.56986600 | 0.82078100  |
| C | 4.06322000  | 0.56579400  | -1.58030100 |

|   |            |             |             |
|---|------------|-------------|-------------|
| C | 3.64856000 | -0.70654200 | -1.22260600 |
| C | 3.90419700 | -0.17896000 | 1.04315600  |
| C | 4.32055300 | 1.09679100  | 0.71737200  |
| C | 4.41003900 | 1.51105500  | -0.61570900 |
| H | 4.10727600 | 0.81171400  | -2.63997700 |
| H | 3.35642600 | -1.48296100 | -1.92212400 |
| H | 3.80164200 | -0.56013200 | 2.05410300  |
| H | 4.57283100 | 1.77804700  | 1.52888300  |
| N | 3.56387700 | -1.08081800 | 0.08041600  |
| O | 3.15687700 | -2.24867500 | 0.40081400  |
| C | 4.84841000 | 2.90421500  | -0.97487100 |
| H | 4.14544900 | 3.64648900  | -0.57602600 |
| H | 5.83820600 | 3.12359200  | -0.55530400 |
| H | 4.89947400 | 3.03127000  | -2.06117900 |

# S-CF<sub>3</sub>...PO-OH

|   |             |             |             |
|---|-------------|-------------|-------------|
| C | 3.09352000  | -0.79911400 | 0.11409400  |
| C | 3.25950600  | 0.38934700  | -0.57759600 |
| C | 4.44575500  | 0.64144000  | -1.25778700 |
| C | 5.44470900  | -0.33027200 | -1.21272200 |
| C | 5.25940300  | -1.52406400 | -0.50474900 |
| C | 4.06920700  | -1.78087100 | 0.17848100  |
| C | 2.08214300  | 1.30151600  | -0.51034700 |
| H | 4.56955800  | 1.57747100  | -1.79956400 |
| H | 6.38559600  | -0.16041400 | -1.73311200 |
| H | 6.05656300  | -2.26547900 | -0.48438300 |
| H | 3.91413600  | -2.70430700 | 0.73301600  |
| N | 1.14024300  | 0.75335100  | 0.37858800  |
| S | 1.48814300  | -0.88110100 | 0.88185400  |
| O | 1.94136400  | 2.33678200  | -1.10261300 |
| O | 0.59613500  | -1.80271500 | 0.17285900  |
| O | 1.59871900  | -0.93670400 | 2.33875600  |
| C | -0.20699400 | 1.24909700  | 0.43812200  |
| F | -0.81915900 | 1.12507200  | -0.74184800 |
| F | -0.86754400 | 0.51957000  | 1.34089700  |
| F | -0.21757300 | 2.52038700  | 0.79367100  |
| C | -4.18850600 | -1.31997900 | 0.56784100  |
| C | -3.77690900 | -0.08549300 | 1.04047200  |
| C | -3.84287600 | 0.81030200  | -1.11734200 |
| C | -4.25750200 | -0.39873600 | -1.63923700 |
| C | -4.43484700 | -1.49271200 | -0.79260800 |
| H | -4.30767600 | -2.13857500 | 1.27619600  |
| H | -3.55697200 | 0.12786300  | 2.08155100  |
| H | -3.66789700 | 1.70528000  | -1.70620800 |
| H | -4.43894000 | -0.49735700 | -2.70655700 |
| N | -3.60090500 | 0.97376700  | 0.21162500  |

|   |             |             |             |
|---|-------------|-------------|-------------|
| O | -3.19437900 | 2.10301900  | 0.66729400  |
| O | -4.84132900 | -2.66731900 | -1.34283000 |
| H | -4.88527700 | -3.34922800 | -0.66404500 |

S-CF<sub>3</sub>...PO-OCH<sub>3</sub>

|   |             |             |             |
|---|-------------|-------------|-------------|
| C | -3.19152300 | 0.87365700  | 0.20735500  |
| C | -3.38254400 | -0.13778300 | -0.71932600 |
| C | -4.51259400 | -0.13859800 | -1.52970500 |
| C | -5.43282700 | 0.89683800  | -1.37045100 |
| C | -5.22644200 | 1.90602900  | -0.42184800 |
| C | -4.09137400 | 1.91128800  | 0.39148600  |
| C | -2.29319800 | -1.15513200 | -0.74170200 |
| H | -4.65480200 | -0.93420000 | -2.25867300 |
| H | -6.32770300 | 0.92145400  | -1.98959300 |
| H | -5.96296300 | 2.70038100  | -0.31419900 |
| H | -3.92189900 | 2.68923900  | 1.13311900  |
| N | -1.39936000 | -0.87940900 | 0.30941700  |
| S | -1.66164700 | 0.65671500  | 1.09449800  |
| O | -2.17901400 | -2.06787400 | -1.51386500 |
| O | -0.63957900 | 1.60700600  | 0.64665700  |
| O | -1.89872300 | 0.44896100  | 2.52218400  |
| C | -0.10208700 | -1.49613800 | 0.36147800  |
| F | 0.60191600  | -1.22103600 | -0.73914400 |
| F | 0.54189600  | -1.00108900 | 1.41949100  |
| F | -0.21416600 | -2.80673000 | 0.47956600  |
| C | 4.03623200  | 0.01467100  | -1.58397700 |
| C | 3.58907800  | -1.20580900 | -1.12985500 |
| C | 3.46384400  | -0.39855900 | 1.05796400  |
| C | 3.90770300  | 0.85359500  | 0.65528700  |
| C | 4.19967100  | 1.07867500  | -0.68962500 |
| H | 4.25507600  | 0.15546900  | -2.63955700 |
| H | 3.42086300  | -2.07311300 | -1.76069400 |
| H | 3.20945500  | -0.64921900 | 2.08263700  |
| H | 4.00832700  | 1.62627500  | 1.41078800  |
| N | 3.29666600  | -1.41830800 | 0.18470200  |
| O | 2.85016600  | -2.55730000 | 0.57468900  |
| O | 4.63301600  | 2.25150300  | -1.20904300 |
| C | 4.76498900  | 3.34012000  | -0.31167400 |
| H | 3.80030500  | 3.57553800  | 0.15995600  |
| H | 5.51406100  | 3.12063200  | 0.46259000  |
| H | 5.09717700  | 4.18833800  | -0.91383200 |

S-CF<sub>3</sub>...PO-NH<sub>2</sub>

|   |             |             |             |
|---|-------------|-------------|-------------|
| C | -3.14231100 | 0.73899500  | 0.14080700  |
| C | -3.19566200 | -0.33026000 | -0.73799300 |
| C | -4.31093400 | -0.51327900 | -1.54796900 |

|   |             |             |             |
|---|-------------|-------------|-------------|
| C | -5.35642900 | 0.40309100  | -1.43861900 |
| C | -5.28607300 | 1.47494700  | -0.54017500 |
| C | -4.16690000 | 1.66240000  | 0.27340900  |
| C | -1.98530400 | -1.20086600 | -0.70927700 |
| H | -4.34637300 | -1.35482000 | -2.23731300 |
| H | -6.24326400 | 0.28481600  | -2.05848000 |
| H | -6.11711200 | 2.17490300  | -0.47343500 |
| H | -4.10123500 | 2.49050600  | 0.97615700  |
| N | -1.13923700 | -0.75741200 | 0.32031900  |
| S | -1.60803000 | 0.75704900  | 1.04593700  |
| O | -1.75404300 | -2.13280500 | -1.43156200 |
| O | -0.71607000 | 1.81782500  | 0.57042400  |
| O | -1.83458400 | 0.56933900  | 2.47844700  |
| C | 0.21072000  | -1.23667000 | 0.44209800  |
| F | 0.91773800  | -0.96104800 | -0.65573100 |
| F | 0.76983100  | -0.61545500 | 1.48108800  |
| F | 0.21912100  | -2.54287000 | 0.63931100  |
| C | 4.11187400  | 1.40692500  | 0.51325700  |
| C | 3.67687300  | 0.20715800  | 1.04292900  |
| C | 3.95593300  | -0.85322700 | -1.01504200 |
| C | 4.39992100  | 0.32142100  | -1.59048700 |
| C | 4.49135700  | 1.49475700  | -0.83138400 |
| H | 4.14513600  | 2.28065300  | 1.16152500  |
| H | 3.36647800  | 0.07280100  | 2.07403800  |
| H | 3.85303200  | -1.79377200 | -1.54703000 |
| H | 4.66790500  | 0.31650900  | -2.64555600 |
| N | 3.59679600  | -0.92113000 | 0.29242300  |
| O | 3.17167400  | -2.02428100 | 0.80120200  |
| N | 4.87454500  | 2.70268200  | -1.40300300 |
| H | 5.22142900  | 3.39849700  | -0.75735700 |
| H | 5.44334100  | 2.62954100  | -2.23514300 |

# S-CF<sub>3</sub>...PO-Li

|   |             |             |             |
|---|-------------|-------------|-------------|
| C | -3.12093500 | 0.69143500  | -0.04436600 |
| C | -3.13693100 | -0.61667200 | -0.49833300 |
| C | -4.30649300 | -1.16081500 | -1.01733500 |
| C | -5.44148800 | -0.35130100 | -1.06203600 |
| C | -5.40512000 | 0.96926100  | -0.59826400 |
| C | -4.23206900 | 1.51876900  | -0.07736600 |
| C | -1.82961900 | -1.32296800 | -0.36164300 |
| H | -4.31305500 | -2.19072100 | -1.36967300 |
| H | -6.37233900 | -0.75030200 | -1.46118300 |
| H | -6.30616900 | 1.57883700  | -0.64104000 |
| H | -4.19127500 | 2.54326700  | 0.28726600  |
| N | -0.89196900 | -0.42761700 | 0.16722800  |
| S | -1.51319800 | 1.14468400  | 0.57752300  |

|    |             |             |             |
|----|-------------|-------------|-------------|
| O  | -1.59894400 | -2.46622300 | -0.65317100 |
| O  | -0.88512600 | 2.15883000  | -0.27122400 |
| O  | -1.52978100 | 1.30600000  | 2.03226000  |
| C  | 0.43819600  | -0.83537800 | 0.53700100  |
| F  | 1.09331900  | -1.28174400 | -0.52930100 |
| F  | 1.06510700  | 0.23342200  | 1.02756000  |
| F  | 0.40374200  | -1.79220800 | 1.45214400  |
| C  | 4.61378700  | 1.58494100  | -0.04531500 |
| C  | 4.10452400  | 0.65032200  | 0.84477700  |
| C  | 4.14775400  | -0.97580400 | -0.82489800 |
| C  | 4.65750400  | -0.04839300 | -1.72226200 |
| C  | 4.92227100  | 1.29907500  | -1.39357400 |
| H  | 4.76196000  | 2.58601400  | 0.36782600  |
| H  | 3.85047500  | 0.84624900  | 1.88288500  |
| H  | 3.92694900  | -2.01486300 | -1.05325700 |
| H  | 4.84499900  | -0.43004400 | -2.72929300 |
| N  | 3.86621800  | -0.62920500 | 0.45792400  |
| O  | 3.37376600  | -1.48475700 | 1.27874000  |
| Li | 5.59425500  | 2.65116400  | -2.65491800 |

#### S-SiF<sub>3</sub>...PO

|    |             |             |             |
|----|-------------|-------------|-------------|
| C  | -3.16918000 | -0.64135100 | 0.19837000  |
| C  | -3.10976900 | 0.73700900  | 0.28725300  |
| C  | -4.24697600 | 1.46788500  | 0.61239100  |
| C  | -5.43132700 | 0.76708500  | 0.83879300  |
| C  | -5.47310700 | -0.62987800 | 0.74205200  |
| C  | -4.33064200 | -1.36459400 | 0.41780600  |
| C  | -1.74522700 | 1.28347100  | 0.00567600  |
| H  | -4.19142500 | 2.55289900  | 0.68087200  |
| H  | -6.33947000 | 1.31077300  | 1.09394400  |
| H  | -6.41155200 | -1.15179700 | 0.92294600  |
| H  | -4.34926400 | -2.44990600 | 0.34020800  |
| N  | -0.86333800 | 0.26119300  | -0.30738100 |
| S  | -1.55680600 | -1.29283300 | -0.21505100 |
| O  | -1.44314200 | 2.45554500  | 0.04648300  |
| O  | -1.00370600 | -2.04008200 | 0.92589400  |
| O  | -1.57695100 | -1.93111300 | -1.53936600 |
| F  | 1.21633800  | 1.21345500  | 0.81145900  |
| F  | 1.20102700  | -1.01582600 | -0.81346600 |
| F  | 0.60080700  | 1.53916300  | -1.94441600 |
| Si | 0.90119900  | 0.58958400  | -0.66947400 |
| C  | 4.92023700  | -1.51338100 | 0.32238100  |
| C  | 3.99273700  | -0.92463700 | -0.52073300 |
| C  | 3.99965500  | 1.04149700  | 0.78400700  |
| C  | 4.92778400  | 0.49028800  | 1.65041300  |
| C  | 5.39491900  | -0.80183600 | 1.42129200  |

|   |            |             |             |
|---|------------|-------------|-------------|
| H | 5.25408800 | -2.52570000 | 0.11009100  |
| H | 3.54580900 | -1.39148400 | -1.39290300 |
| H | 3.55806600 | 2.02874000  | 0.87604200  |
| H | 5.26780800 | 1.07825900  | 2.49893300  |
| H | 6.12164600 | -1.25057200 | 2.09577800  |
| N | 3.56568000 | 0.32532200  | -0.26848300 |
| O | 2.69652800 | 0.89363100  | -1.11073800 |

#### S-SiF<sub>3</sub>...PO-NO<sub>2</sub>

|    |             |             |             |
|----|-------------|-------------|-------------|
| C  | 3.75962200  | -0.95808200 | -0.09844600 |
| C  | 3.87897200  | 0.31028300  | -0.63648300 |
| C  | 5.05892900  | 0.69732100  | -1.26169400 |
| C  | 6.10084200  | -0.22779700 | -1.32065400 |
| C  | 5.96188500  | -1.50799900 | -0.76867400 |
| C  | 4.77664900  | -1.89813300 | -0.14231100 |
| C  | 2.64471100  | 1.13770400  | -0.46572800 |
| H  | 5.14603700  | 1.69703400  | -1.68352900 |
| H  | 7.03825900  | 0.04552500  | -1.80244500 |
| H  | 6.79133100  | -2.21084300 | -0.82924300 |
| H  | 4.65525200  | -2.88923400 | 0.29040400  |
| N  | 1.67944900  | 0.43442500  | 0.24208100  |
| S  | 2.14074700  | -1.16485200 | 0.62375400  |
| O  | 2.49267500  | 2.26146600  | -0.88837100 |
| O  | 1.34580100  | -2.12570900 | -0.15742400 |
| O  | 2.24057700  | -1.34050800 | 2.07924600  |
| F  | -0.41216200 | 1.20865100  | -1.01846600 |
| F  | -0.45353400 | -0.25355700 | 1.31006200  |
| F  | 0.53851100  | 2.42593800  | 1.35605100  |
| Si | 0.02448200  | 1.12088000  | 0.55585700  |
| C  | -4.26679300 | 0.59483700  | -1.17717900 |
| C  | -3.19665100 | 1.33057600  | -0.69959000 |
| C  | -3.19284600 | 0.10580300  | 1.32526500  |
| C  | -4.26289000 | -0.66148300 | 0.89914200  |
| C  | -4.78397300 | -0.39629400 | -0.35750000 |
| H  | -4.68656600 | 0.78438200  | -2.16087600 |
| H  | -2.68647300 | 2.12291100  | -1.23797800 |
| H  | -2.68189000 | -0.00531900 | 2.27637700  |
| H  | -4.67703500 | -1.44454500 | 1.52750000  |
| N  | -2.70003600 | 1.07121200  | 0.52564700  |
| O  | -1.69577200 | 1.81500800  | 0.97451100  |
| N  | -5.93600200 | -1.19454500 | -0.84090500 |
| O  | -6.36926700 | -2.03965900 | -0.08951000 |
| O  | -6.35446000 | -0.93583900 | -1.94791800 |

#### S-SiF<sub>3</sub>...PO-CN

|   |             |            |             |
|---|-------------|------------|-------------|
| C | -3.48693600 | 0.89698800 | -0.07948500 |
|---|-------------|------------|-------------|

|    |             |             |             |
|----|-------------|-------------|-------------|
| C  | -3.57945400 | -0.38777600 | -0.58232600 |
| C  | -4.76302600 | -0.82841400 | -1.16378000 |
| C  | -5.83623400 | 0.06087600  | -1.21489000 |
| C  | -5.72417700 | 1.35834100  | -0.69860700 |
| C  | -4.53510300 | 1.80250300  | -0.11693700 |
| C  | -2.31465700 | -1.17111000 | -0.42461800 |
| H  | -4.82897800 | -1.84104300 | -1.55775000 |
| H  | -6.77782600 | -0.25540500 | -1.66114200 |
| H  | -6.57827700 | 2.03172300  | -0.75061900 |
| H  | -4.43422400 | 2.80739900  | 0.28826300  |
| N  | -1.35571500 | -0.42148900 | 0.24278300  |
| S  | -1.85568900 | 1.17351100  | 0.59109800  |
| O  | -2.13764600 | -2.29925200 | -0.82530600 |
| O  | -1.11308100 | 2.13441300  | -0.24021500 |
| O  | -1.92165500 | 1.39024300  | 2.04328300  |
| F  | 0.72526600  | -1.14878600 | -1.05905300 |
| F  | 0.77697800  | 0.36511400  | 1.23788500  |
| F  | -0.11749100 | -2.34535400 | 1.36860500  |
| Si | 0.33226600  | -1.04290800 | 0.52565900  |
| C  | 4.55652200  | -0.38519100 | -1.31953400 |
| C  | 3.52600500  | -1.15191200 | -0.80775800 |
| C  | 3.52331100  | 0.10396800  | 1.19220500  |
| C  | 4.55269700  | 0.90070600  | 0.72651000  |
| C  | 5.07865300  | 0.65339600  | -0.54417200 |
| H  | 4.94301700  | -0.59577600 | -2.31299100 |
| H  | 3.03474800  | -1.97025500 | -1.32468700 |
| H  | 3.03222900  | 0.21552800  | 2.15377100  |
| H  | 4.93393600  | 1.70542700  | 1.34894500  |
| N  | 3.04700800  | -0.89303900 | 0.42338500  |
| O  | 2.08133300  | -1.66649500 | 0.90976200  |
| C  | 6.15835500  | 1.46158500  | -1.05080600 |
| N  | 7.02935600  | 2.10497900  | -1.45509900 |

# S-SiF<sub>3</sub>...PO-F

|   |             |             |             |
|---|-------------|-------------|-------------|
| C | -3.36104000 | 0.77350300  | -0.15311600 |
| C | -3.38019100 | -0.56848000 | -0.48485000 |
| C | -4.53590200 | -1.14662500 | -0.99801200 |
| C | -5.65728800 | -0.33305700 | -1.15827000 |
| C | -5.61954200 | 1.02443100  | -0.81414800 |
| C | -4.45876700 | 1.60616500  | -0.30084400 |
| C | -2.07217200 | -1.25185300 | -0.23518900 |
| H | -4.54264300 | -2.20361800 | -1.25828300 |
| H | -6.57873200 | -0.75519600 | -1.55610000 |
| H | -6.51049600 | 1.63632000  | -0.94838500 |
| H | -4.41632200 | 2.65905900  | -0.02878900 |
| N | -1.15537800 | -0.36848200 | 0.31415600  |

|    |             |             |             |
|----|-------------|-------------|-------------|
| S  | -1.74688100 | 1.22373000  | 0.46588600  |
| O  | -1.83508400 | -2.41327700 | -0.48246100 |
| O  | -1.06517400 | 2.11845500  | -0.48342100 |
| O  | -1.82677400 | 1.61618400  | 1.88013400  |
| F  | 0.92533200  | -1.17587600 | -0.91324200 |
| F  | 0.93863300  | 0.66554400  | 1.14373400  |
| F  | 0.18317700  | -2.03683200 | 1.69180500  |
| Si | 0.57302900  | -0.85811000 | 0.65566200  |
| C  | 4.66584500  | -0.38649500 | -1.46757900 |
| C  | 3.69886800  | -1.08256200 | -0.76819200 |
| C  | 3.70593400  | 0.52793600  | 0.95684200  |
| C  | 4.67312100  | 1.26893600  | 0.30483000  |
| C  | 5.14235800  | 0.79428600  | -0.91312600 |
| H  | 5.03467600  | -0.74990600 | -2.42247500 |
| H  | 3.23356400  | -2.00586400 | -1.09942600 |
| H  | 3.24554300  | 0.79899400  | 1.90200000  |
| H  | 5.04650000  | 2.19652200  | 0.72944200  |
| N  | 3.25198300  | -0.61575500 | 0.41221600  |
| O  | 2.33624000  | -1.33113500 | 1.07779100  |
| F  | 6.07045400  | 1.48808300  | -1.56479300 |

S-SiF<sub>3</sub>...PO-CH<sub>3</sub>

|    |             |             |             |
|----|-------------|-------------|-------------|
| C  | 3.39307500  | -0.78170300 | -0.15331900 |
| C  | 3.41096400  | 0.55790200  | -0.49393700 |
| C  | 4.57260400  | 1.13911200  | -0.98979700 |
| C  | 5.70135400  | 0.33083600  | -1.12468100 |
| C  | 5.66470700  | -1.02477600 | -0.77262400 |
| C  | 4.49764300  | -1.60930300 | -0.27672600 |
| C  | 2.09529000  | 1.23602400  | -0.26832600 |
| H  | 4.57857200  | 2.19446800  | -1.25610400 |
| H  | 6.62725700  | 0.75616400  | -1.50827100 |
| H  | 6.56077100  | -1.63269900 | -0.88705700 |
| H  | 4.45522200  | -2.66064800 | 0.00065700  |
| N  | 1.17228600  | 0.34974900  | 0.26380300  |
| S  | 1.76967600  | -1.23577100 | 0.43798200  |
| O  | 1.86088400  | 2.39759700  | -0.51773900 |
| O  | 1.11565500  | -2.14436600 | -0.51796000 |
| O  | 1.82495900  | -1.61888500 | 1.85674100  |
| F  | -0.91528900 | 1.19296400  | -0.92796900 |
| F  | -0.92131100 | -0.67802800 | 1.09958200  |
| F  | -0.12365600 | 2.01079800  | 1.67810500  |
| Si | -0.55268600 | 0.85159200  | 0.63283100  |
| C  | -4.71462100 | 0.43922800  | -1.38281200 |
| C  | -3.71051900 | 1.12251000  | -0.71922300 |
| C  | -3.70838500 | -0.48542200 | 0.99940500  |
| C  | -4.70957900 | -1.19330700 | 0.36495700  |



|   |             |             |             |
|---|-------------|-------------|-------------|
| C | -5.23623800 | -0.74256000 | -0.85180200 |
| H | -5.08115800 | 0.83944800  | -2.32512500 |
| H | -3.23625500 | 2.03566300  | -1.06476600 |
| H | -3.23097400 | -0.76840900 | 1.93212600  |
| H | -5.07308200 | -2.10898100 | 0.82644300  |
| N | -3.23949100 | 0.64820300  | 0.44525900  |
| O | -2.29313700 | 1.34251500  | 1.09116600  |
| C | -6.31604800 | -1.51632300 | -1.55125600 |
| H | -5.94793100 | -2.51353800 | -1.82260500 |
| H | -7.17995300 | -1.65022100 | -0.88907800 |
| H | -6.64531200 | -1.00666800 | -2.46128700 |

S-SiF<sub>3</sub>...PO-OH

|    |             |             |             |
|----|-------------|-------------|-------------|
| C  | -3.36712600 | -0.77501300 | 0.15767800  |
| C  | -3.38495400 | 0.56655800  | 0.49031500  |
| C  | -4.54121800 | 1.14653200  | 1.00009400  |
| C  | -5.66464500 | 0.33496800  | 1.15634400  |
| C  | -5.62830000 | -1.02238700 | 0.81140900  |
| C  | -4.46689400 | -1.60573000 | 0.30137700  |
| C  | -2.07470300 | 1.24778800  | 0.24357000  |
| H  | -4.54671100 | 2.20345600  | 1.26073100  |
| H  | -6.58663000 | 0.75856400  | 1.55145000  |
| H  | -6.52092800 | -1.63265400 | 0.94201500  |
| H  | -4.42546600 | -2.65843300 | 0.02839600  |
| N  | -1.15706800 | 0.36291800  | -0.29995300 |
| S  | -1.75165200 | -1.22573000 | -0.45825500 |
| O  | -1.83951600 | 2.41020800  | 0.48875700  |
| O  | -1.07658400 | -2.12778700 | 0.48927400  |
| O  | -1.83085000 | -1.61516500 | -1.87382000 |
| F  | 0.92319000  | 1.18434700  | 0.91113000  |
| F  | 0.92865900  | -0.67485500 | -1.13451600 |
| F  | 0.16056300  | 2.02234700  | -1.69966400 |
| Si | 0.57358200  | 0.85591500  | -0.65649000 |
| C  | 4.66824500  | -1.25805000 | -0.29849500 |
| C  | 3.69383700  | -0.53003200 | -0.95052300 |
| C  | 3.71275500  | 1.10430200  | 0.74345900  |
| C  | 4.68679700  | 0.42159100  | 1.43694500  |
| C  | 5.17576900  | -0.78188800 | 0.91547400  |
| H  | 5.01792600  | -2.19074400 | -0.73657900 |
| H  | 3.22382000  | -0.82149400 | -1.88481200 |
| H  | 3.25452300  | 2.03338600  | 1.06847800  |
| H  | 5.06574200  | 0.80586200  | 2.37960800  |
| N  | 3.24490200  | 0.62156500  | -0.42415700 |
| O  | 2.31918600  | 1.32952900  | -1.09229100 |
| O  | 6.12236800  | -1.42070700 | 1.61977300  |
| H  | 6.37325200  | -2.24747100 | 1.19044000  |

S-SiF<sub>3</sub>...PO-OCH<sub>3</sub>

|    |             |             |             |
|----|-------------|-------------|-------------|
| C  | 3.61270700  | 0.89626100  | 0.12487200  |
| C  | 3.68774300  | -0.40684000 | 0.57979600  |
| C  | 4.86634200  | -0.88619700 | 1.14037600  |
| C  | 5.95317800  | -0.01546700 | 1.22044200  |
| C  | 5.85939000  | 1.30099700  | 0.75091400  |
| C  | 4.67491300  | 1.78372000  | 0.19082700  |
| C  | 2.41122800  | -1.16631400 | 0.38979800  |
| H  | 4.91745800  | -1.91372500 | 1.49620700  |
| H  | 6.89139200  | -0.36172900 | 1.65136000  |
| H  | 6.72431100  | 1.95886400  | 0.82176900  |
| H  | 4.58821400  | 2.80372800  | -0.17837200 |
| N  | 1.45415100  | -0.37143900 | -0.21995000 |
| S  | 1.98042600  | 1.21890000  | -0.52597800 |
| O  | 2.23202600  | -2.31684700 | 0.72237100  |
| O  | 1.27063300  | 2.17784000  | 0.33632500  |
| O  | 2.04228500  | 1.47755100  | -1.97269200 |
| F  | -0.61081800 | -1.27745400 | 0.95832900  |
| F  | -0.66517700 | 0.48318700  | -1.16678900 |
| F  | 0.30780600  | -2.18166700 | -1.57807200 |
| Si | -0.22677400 | -0.99856100 | -0.60993900 |
| C  | -4.44941100 | -0.77235300 | 1.28994300  |
| C  | -3.39800300 | -1.40893200 | 0.67662100  |
| C  | -3.42377200 | 0.14267700  | -1.09160400 |
| C  | -4.48111200 | 0.82755700  | -0.52184300 |
| C  | -5.00867600 | 0.36967700  | 0.69324200  |
| H  | -4.84170800 | -1.14068300 | 2.23352600  |
| H  | -2.88501900 | -2.28331000 | 1.06525100  |
| H  | -2.93349400 | 0.42683800  | -2.01774600 |
| H  | -4.86379800 | 1.70499900  | -1.03179200 |
| N  | -2.91444300 | -0.94399100 | -0.49462300 |
| O  | -1.91182600 | -1.61298000 | -1.08883300 |
| O  | -6.02261200 | 0.94445000  | 1.34429100  |
| C  | -6.60168100 | 2.11653800  | 0.77568100  |
| H  | -5.85121700 | 2.91303000  | 0.69161900  |
| H  | -7.03361900 | 1.89267600  | -0.20854800 |
| H  | -7.38987700 | 2.42012500  | 1.46624500  |

S-SiF<sub>3</sub>...PO-NH<sub>2</sub>

|   |             |             |            |
|---|-------------|-------------|------------|
| C | -3.36404100 | -0.78418500 | 0.15032700 |
| C | -3.38595800 | 0.55125400  | 0.50555300 |
| C | -4.54361900 | 1.11865500  | 1.02629000 |
| C | -5.66427300 | 0.30083800  | 1.17000400 |
| C | -5.62384100 | -1.05034500 | 0.80190300 |
| C | -4.46089000 | -1.62094200 | 0.28113300 |

|    |             |             |             |
|----|-------------|-------------|-------------|
| C  | -2.07784400 | 1.24089500  | 0.26721800  |
| H  | -4.55228300 | 2.17117300  | 1.30425600  |
| H  | -6.58740900 | 0.71482100  | 1.57260300  |
| H  | -6.51447900 | -1.66565100 | 0.92222300  |
| H  | -4.41603600 | -2.66866400 | -0.00996500 |
| N  | -1.15805800 | 0.36895200  | -0.29126800 |
| S  | -1.74706000 | -1.21770900 | -0.47486400 |
| O  | -1.84883900 | 2.40089800  | 0.53051500  |
| O  | -1.07049800 | -2.13496200 | 0.45735800  |
| O  | -1.82851400 | -1.58566900 | -1.89627200 |
| F  | 0.91625900  | 1.18404500  | 0.92404800  |
| F  | 0.92361800  | -0.65127000 | -1.14778900 |
| F  | 0.13954500  | 2.05225500  | -1.67420900 |
| Si | 0.57486800  | 0.87515000  | -0.65038200 |
| C  | 4.66893900  | -1.23442900 | -0.34270300 |
| C  | 3.69909300  | -0.49687400 | -0.97964900 |
| C  | 3.70078100  | 1.09571400  | 0.74893600  |
| C  | 4.67086700  | 0.40079700  | 1.43134400  |
| C  | 5.17892200  | -0.80094400 | 0.89780100  |
| H  | 5.02267900  | -2.15319200 | -0.80421400 |
| H  | 3.23662600  | -0.76988000 | -1.92322100 |
| H  | 3.24067500  | 2.01555500  | 1.09664800  |
| H  | 5.02806900  | 0.78668600  | 2.38299000  |
| N  | 3.23726900  | 0.64181600  | -0.43042800 |
| O  | 2.30443800  | 1.36066100  | -1.08545200 |
| N  | 6.14775900  | -1.50117400 | 1.54139600  |
| H  | 6.40031200  | -2.42260600 | 1.22124200  |
| H  | 6.40154600  | -1.25945300 | 2.48614300  |

# S-SiF<sub>3</sub>...PO-Li

|   |             |             |             |
|---|-------------|-------------|-------------|
| C | -3.21375900 | 0.72670400  | -0.15533000 |
| C | -3.21726300 | -0.63757500 | -0.37481700 |
| C | -4.38325800 | -1.27922400 | -0.77707400 |
| C | -5.53081700 | -0.50459900 | -0.94493800 |
| C | -5.50855500 | 0.87751000  | -0.71658800 |
| C | -4.33721100 | 1.52219500  | -0.31447300 |
| C | -1.88005600 | -1.27089100 | -0.13694600 |
| H | -4.37730900 | -2.35426400 | -0.94799700 |
| H | -6.46076800 | -0.97736900 | -1.25758500 |
| H | -6.41965400 | 1.45811100  | -0.85466800 |
| H | -4.30544100 | 2.59478200  | -0.13318300 |
| N | -0.96018600 | -0.32994900 | 0.29277100  |
| S | -1.57798100 | 1.25455100  | 0.33317600  |
| O | -1.63594700 | -2.44585200 | -0.30232700 |
| O | -0.97675100 | 2.07712200  | -0.73033600 |
| O | -1.59863300 | 1.78033600  | 1.70686800  |

|    |            |             |             |
|----|------------|-------------|-------------|
| F  | 1.08519100 | -1.19162900 | -0.94093300 |
| F  | 1.12286800 | 0.81484600  | 0.96368500  |
| F  | 0.43580900 | -1.85168500 | 1.75085800  |
| Si | 0.80946400 | -0.75806500 | 0.61446300  |
| C  | 4.89338400 | 1.38570000  | 0.08959300  |
| C  | 3.93149100 | 0.68563300  | 0.79987300  |
| C  | 3.91840200 | -0.98825400 | -0.84587600 |
| C  | 4.88055900 | -0.29730100 | -1.56520500 |
| C  | 5.41982700 | 0.93794100  | -1.14244000 |
| H  | 5.22078100 | 2.32476600  | 0.53835600  |
| H  | 3.48096700 | 0.99719100  | 1.73768000  |
| H  | 3.45756100 | -1.92799700 | -1.13619600 |
| H  | 5.19825600 | -0.76496700 | -2.49842500 |
| N  | 3.46873800 | -0.47735600 | 0.31219000  |
| O  | 2.55800300 | -1.16797800 | 1.02318100  |
| Li | 6.71876700 | 2.00037400  | -2.21742400 |
